# Supplementary material
Source: Royal Society of Chemistry journal article supplement (https://www.rsc.org/suppdata/dt/1999/3553/902973g.doc)
Supplement: Supplementary file 1 [file 902973g.doc]

**Synthesis and Characterisation of Trialkylaluminium-Dialkylamine Adducts: 1H NMR Studies**

Donald C. Bradley*, Gregory Coumbarides, Ian S. Harding, Geoffrey E. Hawkes, Izaque A. Maia#, and Majid Motevalli

Department of Chemistry, Queen Mary & Westfield College, Mile End Road, London E1 4NS.

# Experimental

The numbering scheme and selected data for a range of trialkylaluminium dialkylamine adducts are presented in table 1, below.

All compounds were manipulated under dry nitrogen using a vacuum-line, glove box and Schlenk-style apparatus. Proton NMR spectra were obtained using Bruker AM-250 and AMX-400 spectrometers, with samples in dried deuterobenzene and deuterotoluene solutions sealed into 5 mm o.d. tubes. Infrared spectra (neat and Nujol mulls placed between CsI plates) in the 4000-200 cm-1 range were obtained using a Perkin-Elmer FT1720X spectrophotometer and mass spectra using an AEI MS902 spectrometer operating at 70 eV (ca. 1.12 X 10-17 J). The analyses (C, H and N) were obtained from the Micro-analytical Service of University College London.

Table 2 summarises the experimental conditions of synthesis. All aluminium alkyls, R13Al, were used as solutions; R1 = Me, Et, Bui, But in petroleum spirit (Aldrich) R1 = Pri (freshly prepared) in ether. The amines NHR22 (Aldrich) where R2 = Et, Bui, Pri were used neat; NHMe2 was used as a solution in petroleum spirit because of its volatility. Low temperatures were often required during synthesis, either to combat the volatility of NHMe2 or to prevent adduct decomposition to the amide caused by exothermic adduct formation. The adducts were purified where possible by distillation or sublimation *in vacuo*. Thermal decomposition to the amide (for **3**, **11**, **12**) or a yellow oil (for **18**, **19**, **20**) prevented purification of some compounds; despite this, very clean 1H NMR spectra were obtained from the crude products, which were therefore used unpurified.

Table 3 gives the elemental analysis data for the adducts. The remaining data, *viz*. those obtained from infrared, 1H NMR and mass spectra, are given below, with melting points where relevant. In the mass-spectral data the symbol M+ refers to the molecular ion, D+ to the dimeric amide (compound **9**). In the IR data presentation the following abbreviations were used: s, strong; m, medium; w,weak; br, broad; sh, shoulder; v, very.

**Compound 1** Very reactive and volatile white solid; m.p. 43-45 OC; /cm-1: (Nujol mull) 3242s, 2299w, 2080w, 1187vs, 1022s, 897s, 696s br, 625sh m, 522s, 462m; H(C6D6) –0.77 (9H, s, AlC*H*3), 0.70 (1H, broad, N*H*), 1.53 (6H, d, J=7Hz NC*H*3); m/z 103 (5%, 13M+-Me), 102 (100%, M+-Me), 57(33%, Me2Al+), 45(11%, NHMe2+), 44(51%, NMe2+).

**Compound 2** Viscous colourless liquid;/cm-1: 3282m, 2862s br, 1471vs, 1408s, 1372sh w, 1256w, 1233m, 1189s, 1119vs, 1059vs, 1019vs, 950s, 898vs, 818w, 638vs br, 497sh m, 453w, 335w; H(C7D8) –0.11 (6H, q, J=7Hz, AlC*H*2), 1.03 (1H, broad, N*H*), 1.24 (9H, t, J=7Hz, CH2C*H*3), 1.68 (6H, d, J=7Hz NC*H*3)

**Compound 3** Colourless liquid which thermally decomposes close to room temperature giving the corresponding amide. Data for unpurified product;/cm-1: 3286m, 2902br vs, 2771sh s, 2715sh w, 2602w, 1462vs, 1402m, 1376m, 1359s, 1317s, 1256w, 1232m, 1207m, 1179s, 1160sh m, 1118s, 1065vs, 1041s, 1018vs, 943w, 900vs, 815s, 682br vs, 595sh m, 530s, 455m, 398w, 353w, 304w, 280w, 267w; H(C6D6) 0.04 (6H, d, J=7Hz, AlC*H*2), 0.98 (1H, broad, N*H*), 1.17 (18H, d, J=7Hz, CHC*H*3),1.68 (6H, d, J=7Hz NC*H*3), 1.97 (3H, m, J=7Hz, C*H*CH3); m/z 198 (18%, Bui3Al+), 187 (9%, 13M+- Bui), 186 (78% M+- Bui), 141 (22%, Bui2Al+), 102 (31%), 88 (16%), 72 (17%, HAlNMe2+), 57 (100%, H2AlNMe+).

**Compound 4** Very reactive colourless liquid;/cm-1: 3278vs, 2840vs br, 2573w, 1467vs, 1402s, 1377m, 1256s, 1212s, 1148w, 1116vs, 1049s, 1017vs, 952vs, 893vs, 868vs, 600vs, 497vs, 462vs, 423s, 335m; H(C7D8) 0.29 (3H, septet, J=7Hz, AlC*H*), 1.26 (18H, d, J=7Hz, CHC*H*3), 1.72 (6H, d, J=7Hz NC*H*3); m/z 158 (50%, M+-Pri), 116 (14%, M+-Pri-ppn), 74 (21%, H2AlNMe+), 45 (55%, NHMe2+), 44 (100%, ppn, NMe2+).

**Compound 5** White solid; m.p. 132-134 OC ; /cm-1: (Nujol mull) 3265m, 1358m, 1260m, 1223m, 1173m, 1111m, 1066w, 1024s, 929m, 889s, 807vs, 723w, 565s, 425m, 363w; H(C7D8) 1.14 (27H, s, C(C*H*3)3), 1.45 (1H, broad, N*H*), 1.87 (6H, d, J=7Hz NC*H*3); m/z 198 (13%, But3Al+) 186 (12%, M+-But) 141 (19%, But2Al+), 57 (100%, btn), 44 (24% NMe2+).

**Compound 6** Very reactive colourless liquid;/cm-1: 3249s, 2922vs, 1464s, 1427sh m, 1390s, 1307w, 1282w, 1186vs, 1122s, 1050s, 1002s, 906w, 847m, 790sh vs, 703br vs, 627s, 524m, 302w; H(C6D6) 0.46 (9H, AlC*H*3), 0.62 (6H, t, J=7Hz, NCH2C*H*3), 1.08 (1H, broad, N*H*), 2.25 (4H, br m, J=7Hz, NC*H*2CH3).

**Compound 7** Colourless viscous liquid;/cm-1: 3258w, 2856vs, 2092s, 1610w, 1456m, 1410m, 1388m, 1231m, 1187m, 1122m, 1056m, 949m, 844w, 788w, 638s; H(C6D6) 0.17 (6H, q, J=7Hz, AlC*H*2), 0.57 (6H, t, J=7Hz, NCH2C*H*3), 1.18 (1H, broad, N*H*), 1.46 (9H, t, J=7Hz, CH2C*H*3), 2.21 (4H, two broad peaks, NC*H*2CH3); m/z 158 (56%, M+-Et), 130 (6%, M+-Et-etn), 102 (8%, M+-2Et-etn), 100 (7%, M+-Et-2etn-H2), 73 (28%, NHEt2+), 72 (33%, NEt2+), 58 (100%, NHEt2+-CH3).

**Compound 8** Colourless liquid;/cm-1:3264w 2946vs, 2857s, 2772sh m, 2599w, 1461s, 1402s, 1384m, 1358m, 1316m, 1260w, 1176m, 1158sh m, 1122m, 1053s, 1014m, 993m, 943w, 903w, 843m, 813m, 788m, 677s; H(C6D12) 0.07 (6H, d, J=7Hz, AlC*H*2), 0.96 (18H, d, J=7Hz, AlCH2CH(C*H*3)2) 1.18 (6H, t, J=7Hz, NCH2C*H*3), 1.70 (1H, broad, N*H*), 1.83 (3H, septet, J=7Hz, AlCH2C*H*(CH3)2) 2.71 and 3.05 (4H, sextet and septet, NCH2C*H*3), m/z 214 (18%, M+-Bui), 198 (9%, Bui3Al+), 141 (73%, Bui2Al+), 102 (12%, M+-Bui-2btn), 99 (11%, Bui3Al+-btn-Pri), 85 (100%, Bui3Al+-btn-Bui), 73 (22%, NHEt2+), 72 (14%, NEt2+), 58 (64%, NHEt2+-CH3).

**Compound 9** Colourless liquid;/cm-1:3259m, 2883br vs, 1456vs, 1412m, 1389s, 1118m, 1122s, 1049s, 998vs, 958s, 907w, 868vs, 843m, 596vs, 492w, 426s; H(C6D6) 0.50 (3H, septet, J=7Hz, AlC*H*), 0.59 (6H, t, J=7Hz, NCH2C*H*3), 1.45 (18H, d, J=7Hz, AlCH(C*H*3)2) 1.36 (1H, broad, N*H*), 2.15 and 2.57 (4H, sextet and septet, each peak of the multiplets is split into doublets, J,2Hz, NCH2C*H*3), m/z 328 (21%, D+-ppn) 327 (100%, D+-Pri), 286 (6% 13D+-Pri-ppn), 285 (35% D+-Pri-ppn),186 (46%, M+-Pri), 184 (9%, M+-Pri-H2), 157 (28%, M+-Pri-Et), 144 (11%, M+-Pri-ppn), 142 (25%, M+-Pri-ethane), 113 (53%, Pri2Al+), 102 (19%, AlH3NEt2+), 85 (20%, PriAl-ppn-Et) 72 (21%, NEt2+).

**Compound 10** White solid, crystallised from petroleum spirit at –25 OC; m.p. 84-86 OC;/cm-1:3249m, 2927vs, 2767m, 2726m, 2694m, 2359w, 1466vs, 1404m, 1382s, 1358m, 1315w, 1261w, 1223m, 1200m, 1172w, 1150m, 1118m, 1055s, 1002s, 929m, 898w, 840m, 808vs, 777m, 586m, 559s, 461w, 424s, 360m, 248w, 225w; H(C6D12) 0.58 (6H, t, J=7Hz, NCH2C*H*3), 1.23 (27H, s, CC*H*3), 1.40 (1H, s, N*H*), 2.13 and 2.96 (4H, sextet J=7Hz and septet J=7Hz, each split into doublets 1.5<J<2 Hz, NCH2C*H*3); m/z 198 (14%, But3Al+), 141 (21%, But2Al+) 99 (9%, But2Al+-ppn), 73 (7%, NHEt2+), 58 (18%, NHEt2+-Me), 57 (100%, NEt2+-Me).

**Compound 11** Colourless liquid which thermally decomposes before reaching distillation temperature giving the corresponding amide. Data for unpurified product;/cm-1: 3286m, 1413s, 1396s, 1347w, 1304w, 1242w, 1186vs, 1100w, 1066sh s, 1037vs, 982s, 938s, 901w, 869w, 857m, 703vs br, 625s, 577w, 525m; H(C6D6) –0.44 (9H, s, AlC*H*3), 0.60 (12H, d, J=6Hz, CHC*H*3) 1.67 (2H, m, J=7Hz, C*H*CH3), 2.58 and 1.96 (4H, both broad, NC*H*2); m/z 187 (16%, 13M+-CH3) 186 (100%, M+-CH3) 129 (15%, HNBui2+), 128 (27%, NBui2+), 87 (5%, HNBui2+-ppn), 86 (91%, HNBui2+-Pri), 57 (19%, Bui+).

**Compound 12** Colourless liquid which thermally decomposes before reaching distillation temperature giving the corresponding amide. Data for unpurified product;/cm-1: 3283m, 2904vs, 2791vs, 2720m, 1469vs, 1412vs, 1373s, 1300w, 1237m, 1185s, 1106w, 1062vs, 1037vs, 981vs, 939vs, 861w, 813m, 757w, 648vs, 495m, 403w, 339m; H(C7D8) 0.06 (6H, q, J=8Hz, AlC*H*2), 0.65 (12H, d, J=5Hz, CHC*H*3) 1.32 (9H, t, J=7Hz, AlCH2C*H*3) 1.66 (2H, m, J=7Hz, C*H*CH3), 2.55 and 2.05 (4H, both broad, NC*H*2); m/z 215 (13%, 13M+-Et), 214 (100%, M+-Et), 129 (10%, HNBui2+), 128 (15%, NBui2+), 86 (68%, HNBui2+-Pri), 85 (11%, Et2Al+) 57 (15%, Bui+).

**Compound 13** viscous colourless liquid which thermally decomposes before reaching distillation temperature giving the corresponding amide. Data for unpurified product;/cm-1: 1359s, 1316m, 1261w, 1242w, 1205sh, 1176s, 1158sh m, 1061vs, 1036sh s, 1015sh m, 979m, 935s, 898w, 855w, 813m, 677vs, 430m, 402m, 350w, 305m; H(C6D6) 0.27 (6H, d, J=7Hz, AlC*H*2), 0.63 (12H, two doublets, both J=6Hz, NCH2CCHC*H*3), 1.33 (18H, d, J=7Hz, AlCH2CH(C*H*3)2), 1.63 (2H, m, J=6Hz, NCH2C*H*(CH3)2), 2.01 and 2.66 (4H, two broad peaks, NC*H*2), 2.20 (3H, septet, J=6Hz, AlCH2C*H*(CH3)2), 2.35 (1H, broad, N*H*); m/z 271 (11%, 13M+-Bui), 270 (60%, M+-Bui), 158 (18%, M+-Bui-2btn), 141 (28%, Bui2Al+), 129 (13%, NHBui+), 86 (100%, NHBui+-Pri),85 (33%, HalBui+), 57 (21%, Bui+).

**Compound 14** Very reactive colourless liquid;/cm-1:3200m, 2888vs, 2743m, 2709m, 2569w, 2362w, 2142w, 1466vs, 1410vs, 1395vs, 1373vs, 1282w, 1241m, 1209s, 1153m, 1103m, 1056vs, 960vs, 932vs, 907s, 867vs, 719s, 506vs, 493m, 431vs, 315w; H(C7D8) 0.49 (3H, septet, J=7Hz, AlC*H*), 0.62 and 0.68 (12H, two doublets, J=6.3Hz each, NCH2CHC*H*3), 1.41 (18H, d, J=7Hz, AlCH(C*H*3)2) 1.64 (2H, m, J=6Hz, NCH2C*H*(CH3)2), 2.10 and 2.66 (4H, septet J=4Hz and quintet J=5Hz NC*H*2), 2.27 (1H, broad, N*H*), m/z 273 (9%, unassigned), 242 (23%, M+-Pri), 156 (10%, Pri3Al+), 129 (11%, NHBui+), 113 (13%, Pri2Al+), 86 (100%, NHBui+-Pri).

**Compound 15** Very reactive white solid, m.p.102-104 OC; /cm-1: 3265w, 1313w, 1220m, 1171w, 1150w, 1060s, 1004w, 970m, 934s, 852w, 808s, 723w, 597m, 561m, 420m, 363w;H(C6D6) 0.65 (12H, broad, CHC*H*3), 1.31 (27H, s, AlCC*H*3), 1.52 (2H, m, J=8Hz, NCH2C*H*CH3) 2.37 and 2.99 (4H, two broad peaks, NC*H*2); m/z 198 (13%, But3Al+) 141 (19%, But2Al+), 129 (9%, NHBui2+), 99 (10%, But3Al+-btn-Pri), 86 (90%, NHBui2+-Pri), 57 (27%, Bui+).

**Compound 16** Colourless liquid, /cm-1: 3238m, 2977vs, 2927vs, 2819m, 1470m, 1422w, 1361w, 1340w, 1304w, 1186vs, 1143s, 1115w, 1091w, 1046s, 969m, 946w, 928w, 913w, 835w, 776m, 703vs, 639vs, 585w, 527m, 467w, 395w, 281w; H(C6D6) –0.42 (9H, s, AlC*H*3), 0.85 and 0.91 (12H, two doublets, both J=7Hz, CHC*H*3)1.54 (1H, broad, N*H*), 2.92 (2H, complex multiplet, C*H*CH3); m/z 101 (26%, NHPri2+), 87 (6%, 13NHPri2+-Me), 86 (100%, NHPri2+-Me), 58 (10%, unassigned)

**Compound 17** Colourless liquid, /cm-1: 3225w, 2900vs, 1463s, 1406m, 1394s, 1375s, 1331w, 1294m, 1225w, 1187s, 1163m, 1138s, 1090w, 1050s, 969s, 950s, 913m, 831w, 769m, 644vs, 500w; H(C6D6) 0.25 (6H, q, J=8Hz, AlC*H*2), 0.79 (12H, two doublets, J=6Hz, NCHC*H*3) 1.49 (9H, t, J=8Hz, AlCH2C*H*3) 1.69 (1H, Br, N*H*), 2.89 (2H, m, J=7Hz, C*H*CH3); m/z 186 (13%, M+-Et), 114 (20%, Et3Al+) 101 (14%, HNPri2+) 86 (68%, HNPri2+-Me), 58 (12%, EtAlH2+), 44 (100%, NHEt+).

**Compound 18** Very air sensitive white solid, /cm-1: 3252w, 2945vs, 2859vs, 2599w, 1463s, 1389s, 1378s, 1358m, 1316m, 1261w, 1204m, 1175m, 1160m, 1140m, 1084m, 1039m, 1016w, 967w, 944w, 911w, 814m, 773m, 754m, 668s; H(C6D6) 0.31 (6H, d, J=7Hz, AlC*H*2), 0.86 (12H, d, J=6Hz, NCHC*H*3), 1.33 (18H, d, J=6Hz, AlCH2CH(C*H*3)2), 1.68 (1H, broad, N*H*), 2.16 (3H, m, J=7Hz, AlCH2C*H*(CH3)2), 2.99 (2H, m, J=7Hz, NC*H*(CH3)2; m/z 141 (14%, Bui2Al+), 101 (10%, NHPri2+), 86 (56%, NHPri2+-Me), 86 (17%, BuiAlH+).

**Compound 19** Very air sensitive white solid, decomposes in the condensed phase at room temperature. H(C6D6) 0.58 (3H, septet, J=7Hz, AlC*H*), 0.86 (12H, d, J=6Hz, NCHC*H*3), 1.50 (18H, d, J=7Hz, AlCH(C*H*3)2) 2.93 (2H, septet, J=7Hz, NC*H*(CH3)2).

**Compound 20** Very air sensitive white solid; /cm-1:3246w, 1338w sh, 1305m, 1261s, 1206m, 1172vs, 1136s, 1087s, 1037vs, 1005sh s, 960w, 926m, 907m, 882w, 807vs, 763m, 708m, 636m, 587s, 558m, 480w, 420s, 380sh m; H(C6D6) 0.98 (12H, broad, CHC*H*3), 1.19 (27H, s, AlCC*H*3), 2.94 (2H, septet, J=6Hz, NC*H*CH3).

Table 1 Selected infra-reda and mass spec. data for the adducts R13Al.NHR22.

Compound Infrared Spectroscopy Mass Spectra

R2 R1 No. N-H frequencies associated with the adduct core M+-R Intens.(%)

Me Me **1** 3241(m) 708(br,s) 622(sh,m) 593(sh,w) 523(m) M+-Me 100

(3368w)b Et **2** 3282(m) 638(br,vs) 571(sh,vs) ------ 497(m) Dissoc.c

Bui **3** 3286(m) 682(br,vs) 670(sh,vs) 595(m) 530(s) M+-Bui 78

Pri **4** 3278(vs) 600(br,vs) 575(sh,vs) 497(vs) 423(s) M+-Pri 50

But **5** 3265(m) 565(s) 470(s) 448(sh,w) 425(m) Dissoc.c

Et Me **6** 3249(s) 703(br,vs) 627(sh,vs) 582(sh,w) 524(m) M+-Et 56

(3290m)b Et **7** 3258(w) 638(br,s) ------ ------ ------ M+-Et 56

Bui **8** 3264(w) 677(br,s) ------ ------ ------ Dimerd

Pri **9** 3259(m) 596(br,vs) ------ 429(w) 426(s) Dissoc.c

But **10** 3249(m) 586(m) 559(s) ------ 424(s) Dissoc.c

Bui Me **11** 3246(m) 703(br,vs) 625(s) 577(sh,w) 525(m) M+-Me 100

(absent)b Et **12** 3283(m) 648(br,vs) 620(sh,s) ------ 495(m) M+-Et 100

Bui **13** 3285(w) 677(br,vs) ------ ------ 430(m) M+-Bui 60

Pri **14** 3200(m) 595(br,vs) ------ 493(m) 431(vs) Dissoc.c

But **15** 3265(w) 597(w) 561(m) ------ 420(m) Dissoc.c

Pri Me **16** 3238(m) 703(br,vs) 639(m) 582(w) 527(m) Dissoc.c

(absent)b Et **17** 3225(w) 644(br,vs) 606(sh,s) 570(sh,w) 500(w) Dissoc.c

Bui **18** 3252(w) 675(br,vs) ------ ------ ------ Dissoc.c

Pri **19** ------ ------ ------ ------ ------ -----

But **20** 3246(w) 587(s) 558(sh,w) ------ 420(s) -----

a  values in cm-1; s, strong; m, medium; w,weak; br, broad; sh, shoulder; v, very.

b N-H of free amine

c The fragments are derived only from the dissociation into free trialkylaluminium and amine

d The fragments are derived from the corresponding dimeric amide

Table 2 Summary of the experimental conditions for the synthesis of the adducts R13Al.NHR22.

| Compound | Reagents | | Reaction | | Product | Purificationa | Yield |
| --- | --- | --- | --- | --- | --- | --- | --- |
|  | R13Al | NHR22 | Temperature | Time |  |  |  |
|  | mmol | mmol | OC | hrs |  |  | % |
| **1** | 33 | 38 | -30 | 1 | white solid | Sublime; 25 OC | 87 |
| **2** | 61 | 67 | -30 | 2 | clear liquid | Distil; 50 OC | 82 |
| **3** | 29 | 34 | -20 | 6 | clear liquid | Crude | 100 |
| **4** | 24 | 44 | -40 | 48 | clear liquid | Distil; 85 OC | 77 |
| **5** | 19 | 25 | -20 | 12 | white solid | Sublime; 80 OC | 91 |
| **6** | 93 | 116 | 25 | 1 | clear liquid | Distil; 50 OC | 96 |
| **7** | 67 | 77 | 25 | 4 | clear liquid | Distil; 100 OC | 92 |
| **8** | 40 | 48 | 0 | 12 | clear liquid | Distil; 85 OC | 80 |
| **9** | 38 | 80 | 25 | 23 | clear liquid | Distil; 80 OC | 89 |
| **10** | 28 | 33 | 25 | 15 | white solid | Sublime; 65 OC | 85 |
| **11** | 111 | 126 | 25 | 1 | clear liquid | Distil; 80 OC | 95 |
| **12** | 33 | 40 | -20 | 1 | clear liquid | Crude | 100 |
| **13** | 19 | 29 | -20 | 1 | clear liquid | Crude | 100 |
| **14** | 24 | 27 | 25 | 48 | clear liquid | Distil; 100 OC | 87 |
| **15** | 29 | 40 | 25 | 2 | white solid | Sublime; 100 OC | 93 |
| **16** | 112 | 143 | 25 | 1 | clear liquid | Distil; 45 OC | 93 |
| **17** | 96 | 107 | 25 | 1 | clear liquid | Distil; 80 OC | 91 |
| **18** | 43 | 44 | -20 | 1 | clear liquid | Crude | 100 |
| **19** | 8 | 11 | -20 | 48 | white solid | Crudeb | 100 |
| **20** | 10 | 14 | -20 | 1 | white solid | Crude | 100 |

aat 10-2 mbar

b begins to decompose at room temperature.

Table 3 Analytical dataa for the adducts R13Al.NHR22

Compound C H N

**1** 50.3(51.2) 14.3(13.8) 12.3(12.0)

**2** 65.3(60.4) 10.6(13.8) 8.4(8.8)

**3**

**4** 67.8(65.7) 13.6(13.9) 7.0(6.9)

**5** 68.5(69.1) 14.3(14.1) 5.9(5.8)

**6** 58.2(57.9) 13.7(13.8) 9.4(9.6)

**7** 63.0(64.2) 14.4(14.0) 7.2(7.5)

**8** 70.5(70.8) 14.3(14.1) 5.2(5.2)

**9** 68.1(68.1) 13.9(14.0) 5.8(6.1)

**10** 71.2(70.8) 13.5(14.1) 5.6(5.2)

**11** 64.8(65.6) 14.4(14.0) 6.8(7.0)

**12** 67.7(69.1) 13.6(14.1) 5.6(5.8)

**13** 72.5(73.3) 13.9(14.2) 4.6(4.3)

**14** 70.2(70.0) 14.1(15.9) 4.7(4.8)

**15** 72.9(73.3) 13.7(14.2) 4.8(4.2)

**16** 61.9(62.3) 13.5(14.0) 7.9(8.1)

**17** 65.4(66.9) 13.0(14.1) 6.1(6.5)

**18** 70.3(72.2) 14.1(14.0) 4.6(4.7)

**19**

**20** 67.9(72.2) 13.4(14.0) 3.3(4.7)

a values as %, calculated values in parentheses

**Figure captions**

Figure 1. X-ray crystal structures of (a) Me3Al.NHMe2 and (b) But3Al.NHEt2

Figure 2. Projection of the X-ray structures along the Al-N bond for (a) Me3Al.NHMe2 and (b) But3Al.NHEt2

Figure 3. Selected regions of the 250 MHz 1H NMR spectra, measured at ambient temperature, of complexes **1** to **20**

Figure 4. Effect of change in the substituent R1 upon the methylene proton region of the 250 MHz 1H NMR spectra of the complexes R13Al.NHEt2, measured at ambient temperature in C6D6 solution.

Figure 5. Effect of change in the substituent R1 upon the methylene proton region of the 250 MHz 1H NMR spectra of the complexes R13Al.NHBui2, measured at ambient temperature in C6D6 solution.
